# Supplementary material for: On the Path to Sustainable Cosmetics: Development of a Value-Added Formulation of Solid Shampoo Incorporating Mango Peel Extract
Source: MDPI journal article supplement (doi:10.3390/cosmetics10050140), 2023-10-03
Supplement: s1 [file s1]

## Supplementary Material

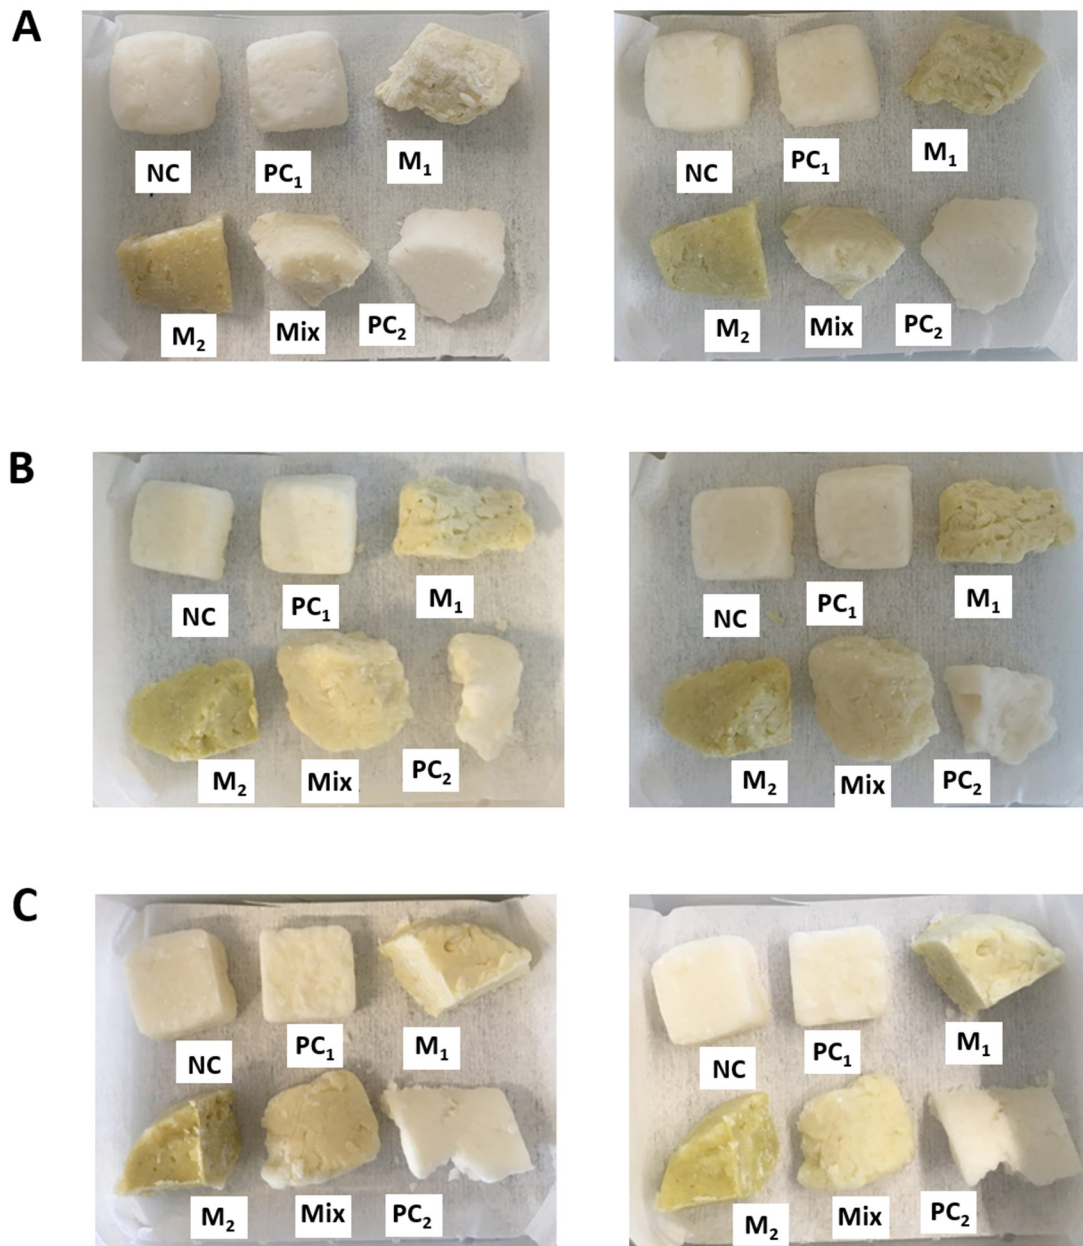

*Figure S1. Results of the accelerated thermal stability test to the solid shampoos throughout the study period. (A): t0 – after production; (B): t1 - two weeks after production; (C): t2 – four weeks after production.*

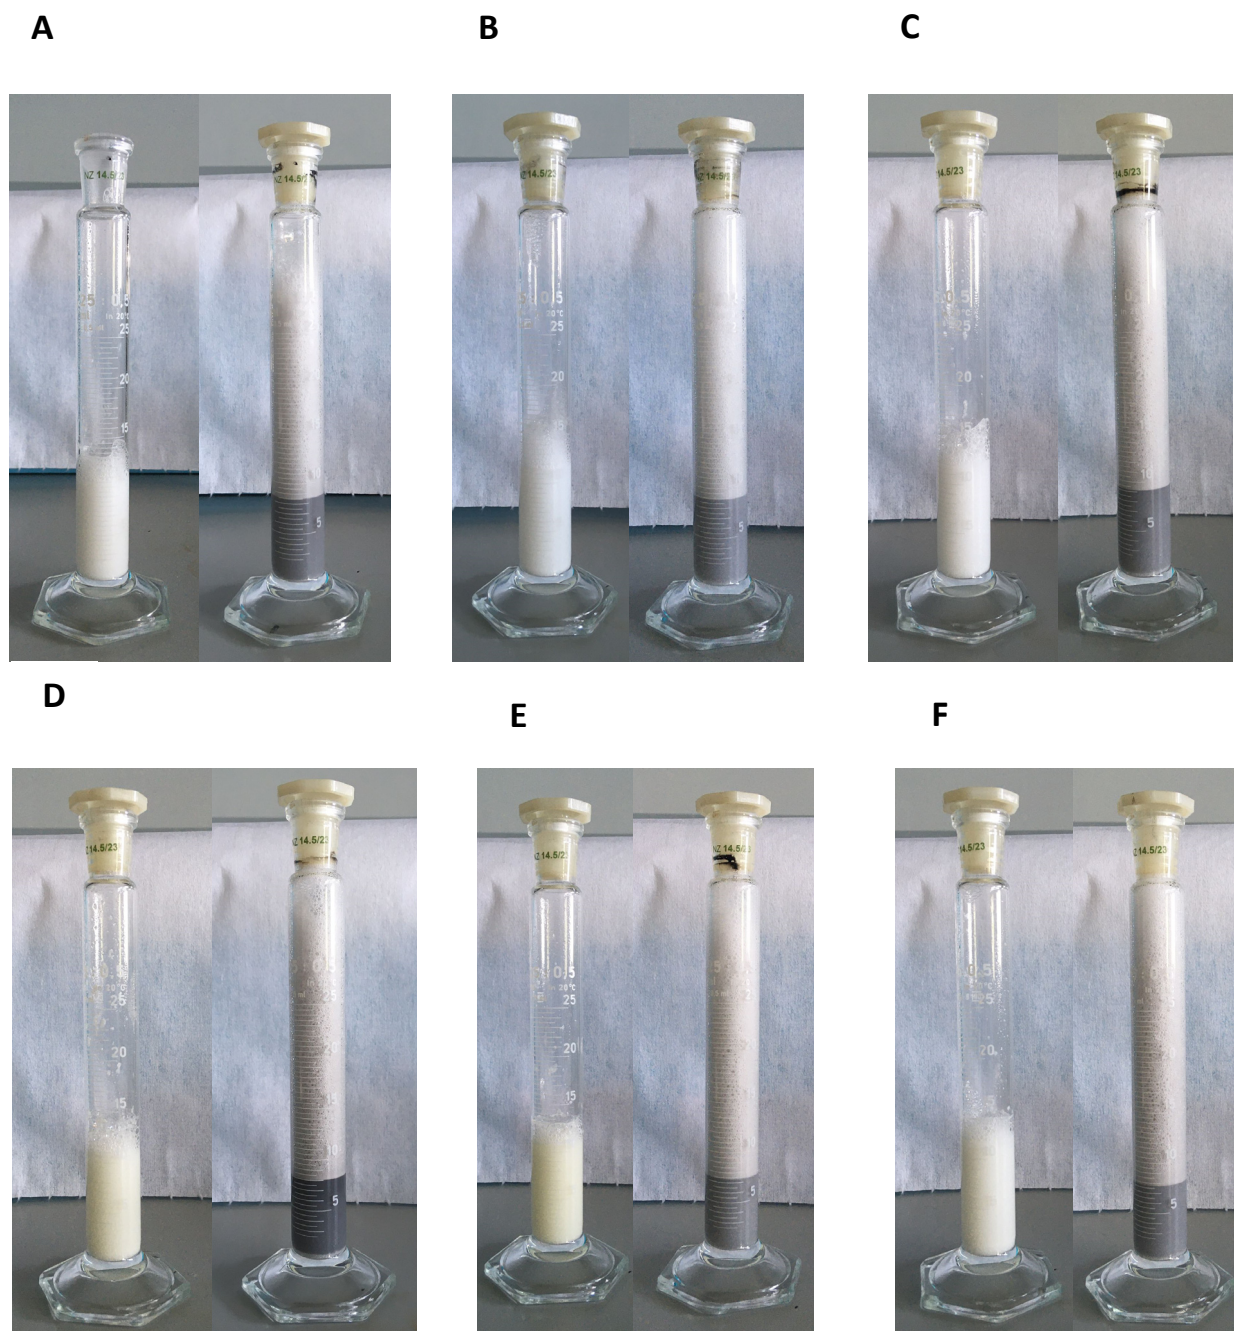

*Figure S2. Results of the dirt dispersion test for t0 – after production of the solid shampoos. (A): Formulation NC; (B): Formulation PC<sub>1</sub>; (C): Formulation PC<sub>2</sub>; (D): Formulation M<sub>1</sub>; (E): Formulation M<sub>2</sub>; (F): Formulation Mix.*



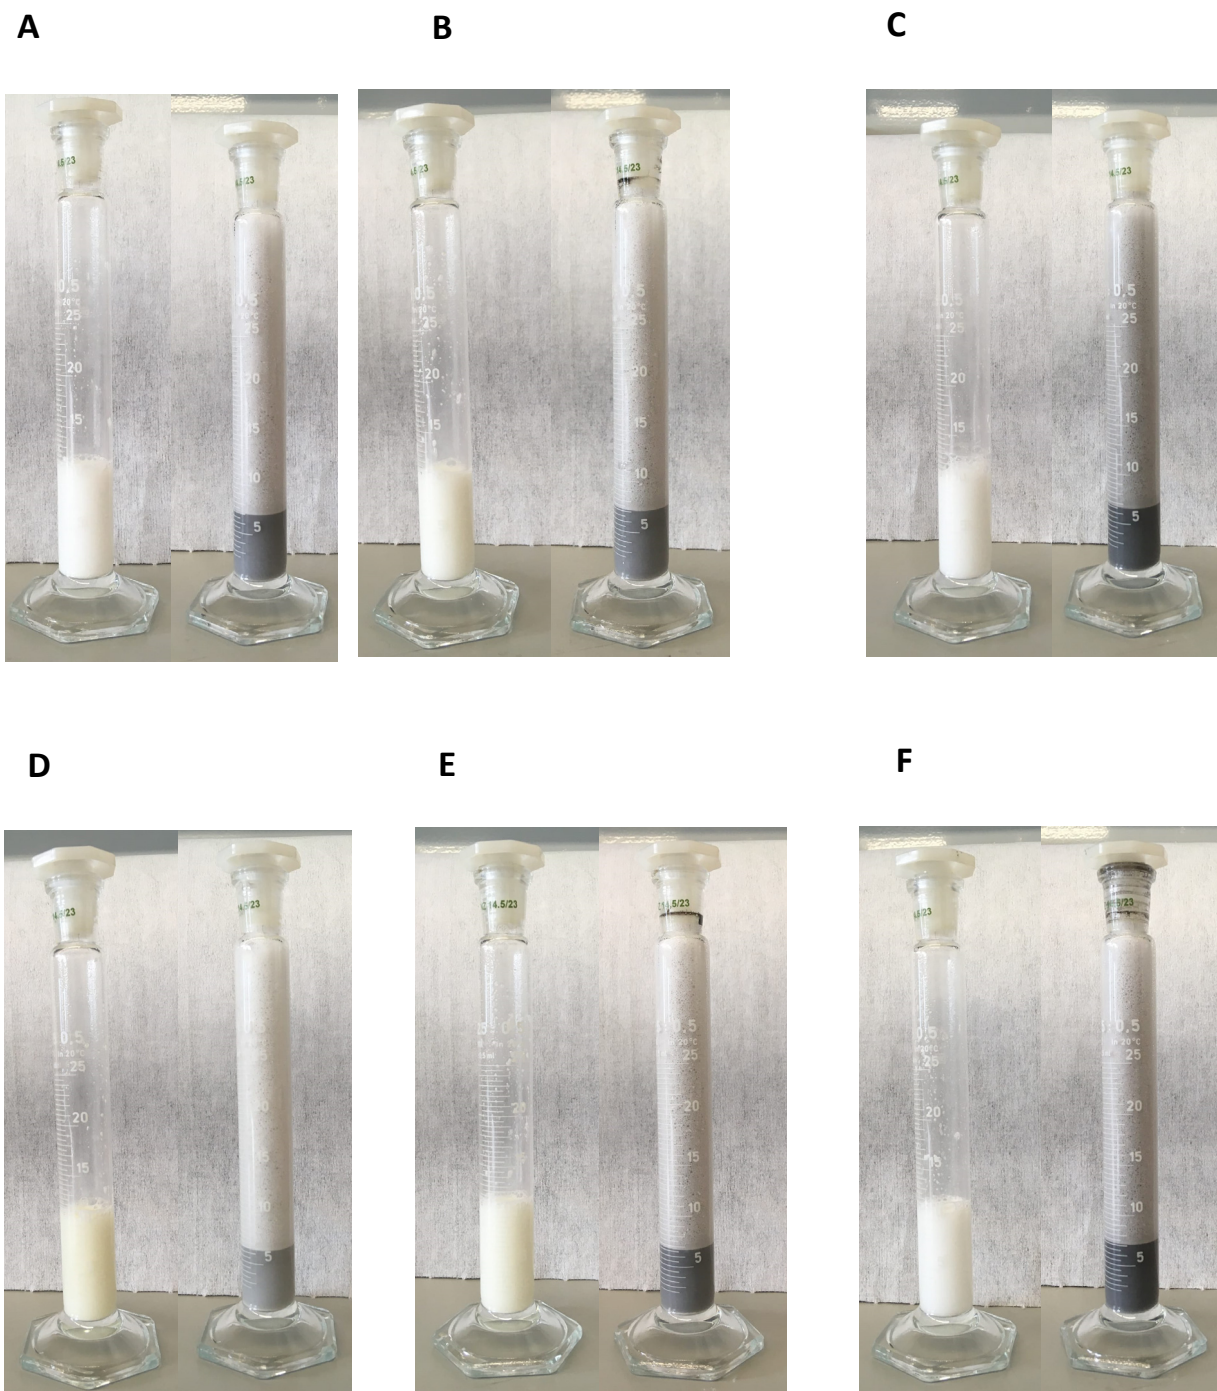

*Figure S3. Results of the dirt dispersion test for t1 – 2 weeks after production of the solid shampoos. (A): Formulation NC; (B): Formulation PC<sub>1</sub>; (C): Formulation PC<sub>2</sub>; (D): Formulation M<sub>1</sub>; (E): Formulation M<sub>2</sub>; (F): Formulation Mix.*

**A**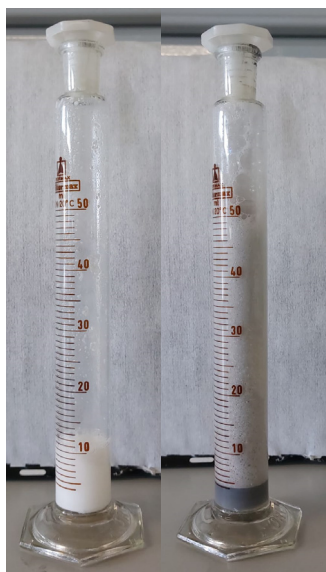**B**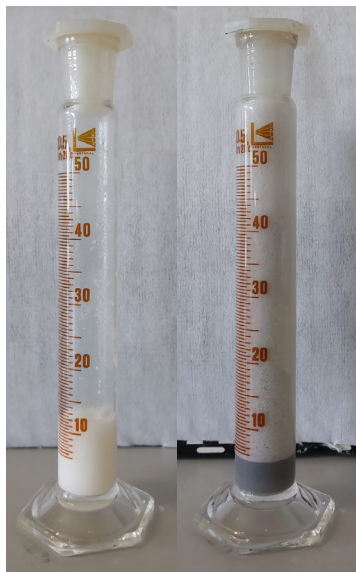**C**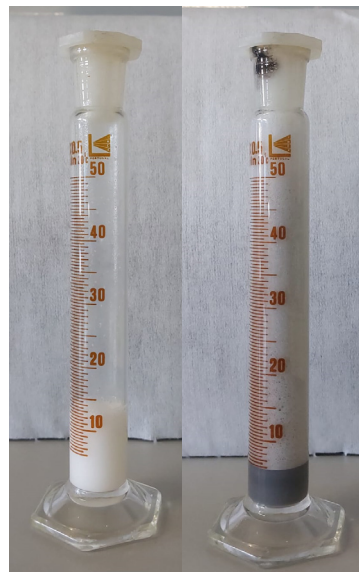**D**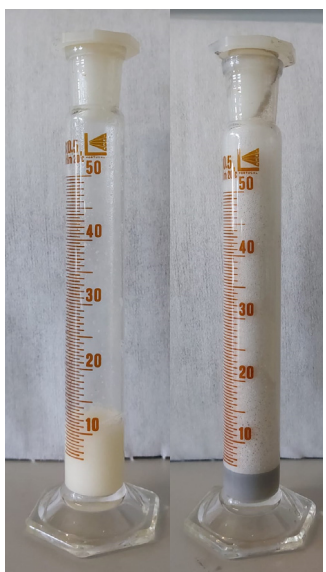**E**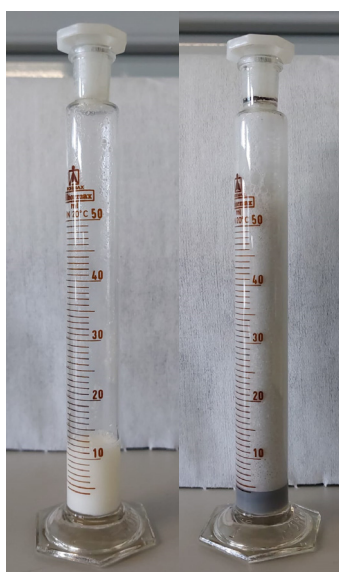**F**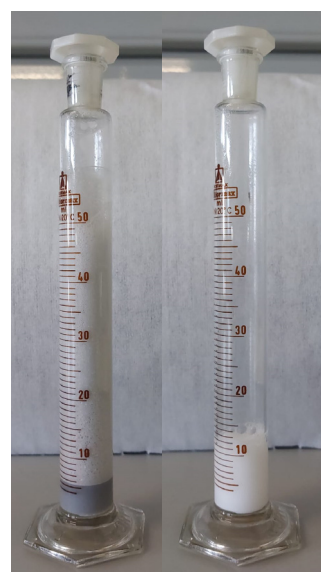

*Figure S4. Results of the dirt dispersion test for t2 – 4 weeks after production of the solid shampoos. (A): Formulation NC; (B): Formulation PC<sub>1</sub>; (C): Formulation PC<sub>2</sub>; (D): Formulation M<sub>1</sub>; (E): Formulation M<sub>2</sub>; (F): Formulation Mix.*
